# Supplementary material for: Protective mechanism of mung bean coat against hyperlipidemia in mice fed with a high-fat diet: insight from hepatic transcriptome analysis
Source: Royal Society of Chemistry journal article supplement (doi:10.1039/d1fo02455h), 2021-01-01
Supplement: d1fo02455h1.pdf [file d1fo02455h1.pdf]

**Table S1** The proximate nutritional composition of MBC (g/100 g dry weight basis)

| Component | Available    | Protein     | Ash         | Fat         | Dietary fiber |             | TPC <sup>a</sup> | TFC <sup>b</sup> |
|-----------|--------------|-------------|-------------|-------------|---------------|-------------|------------------|------------------|
|           | Carbohydrate |             |             |             | Insoluble     | Soluble     |                  |                  |
| MBC       | 9.97 ± 0.12  | 8.55 ± 0.16 | 2.24 ± 0.10 | 0.64 ± 0.07 | 76.20 ± 1.28  | 2.40 ± 0.22 | 26.68 ± 0.12     | 18.23 ± 0.08     |

Data are expressed as mean ± standard deviation ( $n = 3$ ). TPC, Total phenolic content; TFC, Total flavonoid content.

<sup>a</sup> mg gallic acid equivalents (GAE)/100 g

<sup>b</sup> mg (+)-catechin equivalents (CAE)/100 g

**Table S2** Composition of experimental diets<sup>1</sup>

| Ingredient (g/kg)                     | NCD    | NCD-MBC | HFD    | HFD-MBC |
|---------------------------------------|--------|---------|--------|---------|
| Mung bean coat                        | 0.00   | 60.00   | 0.00   | 60.00   |
| Casein, 80 Mesh                       | 189.56 | 184.43  | 258.45 | 253.32  |
| L-Cystine                             | 2.84   | 2.84    | 3.88   | 3.88    |
| Corn Starch                           | 479.79 | 479.79  | 0.00   | 0.00    |
| Maltodextrin 10                       | 118.48 | 111.15  | 161.53 | 154.2   |
| Sucrose                               | 65.21  | 65.21   | 88.91  | 88.91   |
| Cellulose, BW200                      | 47.39  | 0.23    | 64.61  | 17.45   |
| Soybean Oil                           | 23.70  | 23.32   | 32.31  | 31.93   |
| Lard                                  | 18.96  | 18.96   | 316.60 | 316.60  |
| Mineral Mix                           | 9.48   | 9.48    | 12.92  | 12.92   |
| DiCalcium Phosphate                   | 12.32  | 12.32   | 16.80  | 16.80   |
| Calcium Carbonate                     | 5.21   | 5.21    | 7.11   | 7.11    |
| Potassium Citrate, 1 H <sub>2</sub> O | 15.64  | 15.64   | 21.32  | 21.32   |
| Vitamin Mix, V10001                   | 9.48   | 9.48    | 12.92  | 12.92   |
| Choline Bitartrate                    | 1.90   | 1.90    | 2.58   | 2.58    |
| FD&C Yellow Dye #5                    | 0.04   | 0.04    | 0.00   | 0.00    |
| FD&C Blue Dye #1                      | 0.01   | 0.01    | 0.07   | 0.07    |
| Total                                 | 1000   | 1000    | 1000   | 1000    |
| % Energy and their source             |        |         |        |         |
| Protein                               | 20     | 20      | 20     | 20      |
| Carbohydrate                          | 70     | 70      | 20     | 20      |
| Fat                                   | 10     | 10      | 60     | 60      |
| Total                                 | 100    | 100     | 100    | 100     |

<sup>1</sup>NCD, Normal control diet; NCD-MBC, Normal control diet supplemented with mung bean seed coat (MBC); HFD, High-fat diet;

HFD-MBC, High-fat diet supplemented with MBC.

**Table S3** Statistics of hepatic RNA-sequencing reads in different groups

| Sample name | Raw Reads  | Clean Reads | Mapped Reads<br>(Ratio*) | Unique Mapped Reads<br>(Ratio) | Multiple Map Reads<br>(Ratio) |
|-------------|------------|-------------|--------------------------|--------------------------------|-------------------------------|
| NCD-1       | 52,615,536 | 52,210,896  | 49,992,325<br>(95.75%)   | 46,092,942<br>(88.28%)         | 3,899,383<br>(7.47%)          |
| NCD-2       | 46,363,592 | 46,040,032  | 43,847,427<br>(95.24%)   | 39,815,699<br>(86.48%)         | 4,031,728<br>(8.76%)          |
| NCD-3       | 53,565,308 | 53,189,106  | 51,135,574<br>(96.14%)   | 46,988,289<br>(88.34%)         | 4,147,285<br>(7.8%)           |
| HFD-1       | 50,955,026 | 50,536,810  | 48,311,501<br>(95.6%)    | 44,315,408<br>(87.69%)         | 3,996,093<br>(7.91%)          |
| HFD-2       | 51,671,774 | 51,261,488  | 49,536,466<br>(96.63%)   | 46,061,745<br>(89.86%)         | 3,474,721<br>(6.78%)          |
| HFD-3       | 50,363,242 | 49,963,448  | 47,141,247<br>(94.35%)   | 42,846,633<br>(85.76%)         | 4,294,614<br>(8.6%)           |
| HFD-MBC-1   | 46,160,772 | 45,536,938  | 42,483,445<br>(93.29%)   | 36,810,186<br>(80.84%)         | 5,673,259<br>(12.46%)         |
| HFD-MBC-2   | 52,734,392 | 52,323,472  | 49,470,892<br>(94.55%)   | 45,164,537<br>(86.32%)         | 4,306,355<br>(8.23%)          |
| HFD-MBC-3   | 45,891,944 | 45,347,464  | 42,090,777<br>(92.82%)   | 37,302,546<br>(82.26%)         | 4,788,231<br>(10.56%)         |

Note: NCD, normal control diet; HFD, high-fat diet, HFD-MBC, High-fat diet supplemented with mung bean seed coat.

n=3 per group, \* Ratio=Mapped Reads/Clean Reads

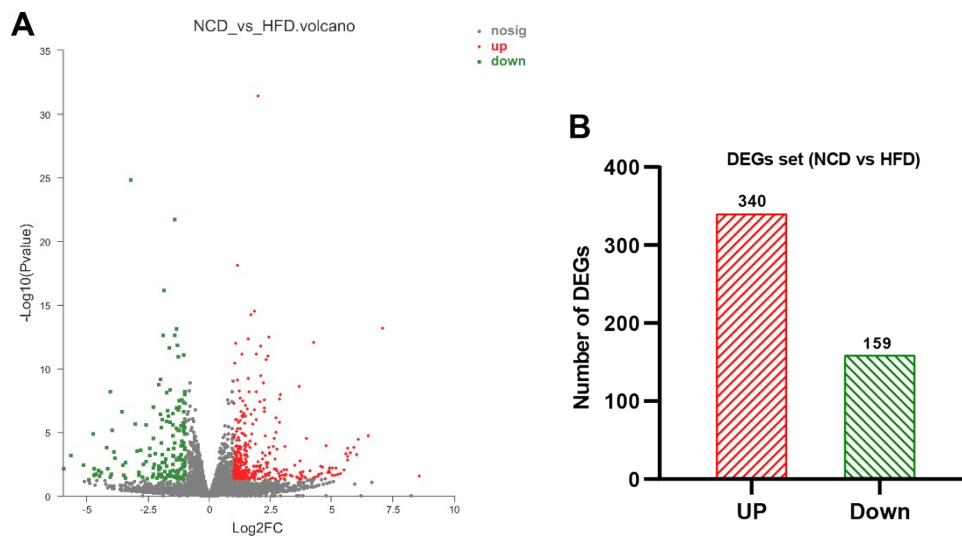

**Figure S1** DEGs in livers between the NCD and HFD groups. (A) Volcano plot with DEGs (HFD-MBC vs HFD); (B) The upregulated and downregulated DEGs.
